# Supplementary material for: MBOAT7-TMC4 rs641738 Is Not Associated With the Risk of Hepatocellular Carcinoma or Persistent Hepatitis B Infection
Source: PubMed Central journal article supplement (PMC8185222; doi:10.3389/fonc.2021.639438), 2021-05-25
Supplement: DataSheet_1.pdf [file DataSheet_1.pdf]

**Supplementary Table S1.** Quality evaluation of included studies by Newcastle-Ottawa Scale

| Study           | Selection (0-4) |    |    |    | Comparability (0-2) |    |    | Exposure (0-3) |    | Score |
|-----------------|-----------------|----|----|----|---------------------|----|----|----------------|----|-------|
|                 | CDA             | RC | SC | DC | SCEA                | AF | AE | SM             | NR |       |
| Thabet (2016)   | 1               | 1  | 1  | 1  | 1                   | 1  | 1  | 1              | 1  | 9     |
| Stickel (2018)  | 1               | 0  | 0  | 1  | 1                   | 1  | 1  | 1              | 1  | 7     |
| Raksayot (2019) | 1               | 1  | 0  | 1  | 0                   | 0  | 1  | 1              | 1  | 6     |
| This study      | 1               | 0  | 0  | 1  | 1                   | 1  | 1  | 1              | 1  | 7     |

Abbreviations: CDA, case definition adequate; RC, representativeness of the cases; SC, selection of controls; DC, definition of controls; SCEA, study controls for sex and age; AF, study controls for any additional factor; AE, ascertainment of exposure; SM, same method of ascertainment for cases and controls; NR, non-response rate.
